# Supplementary material for: The Effect of Berberine on Polycystic Ovary Syndrome Patients with Insulin Resistance (PCOS-IR): A Meta-Analysis and Systematic Review
Source: PubMed Central journal article supplement (PMC6261244; doi:10.1155/2018/2532935), 2018-11-14

# APPENDIXES

Appendix 1. Forest Plots for  
BBR vs. MET

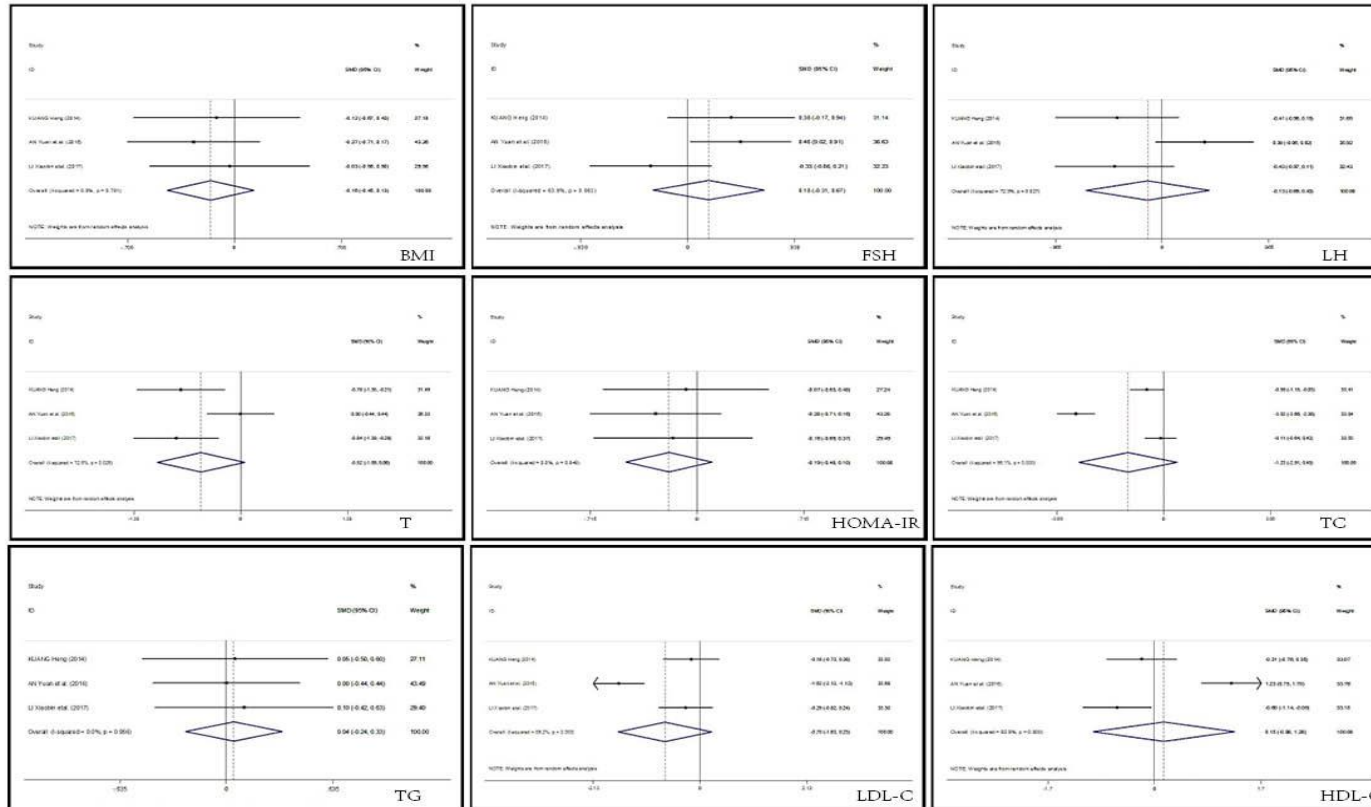

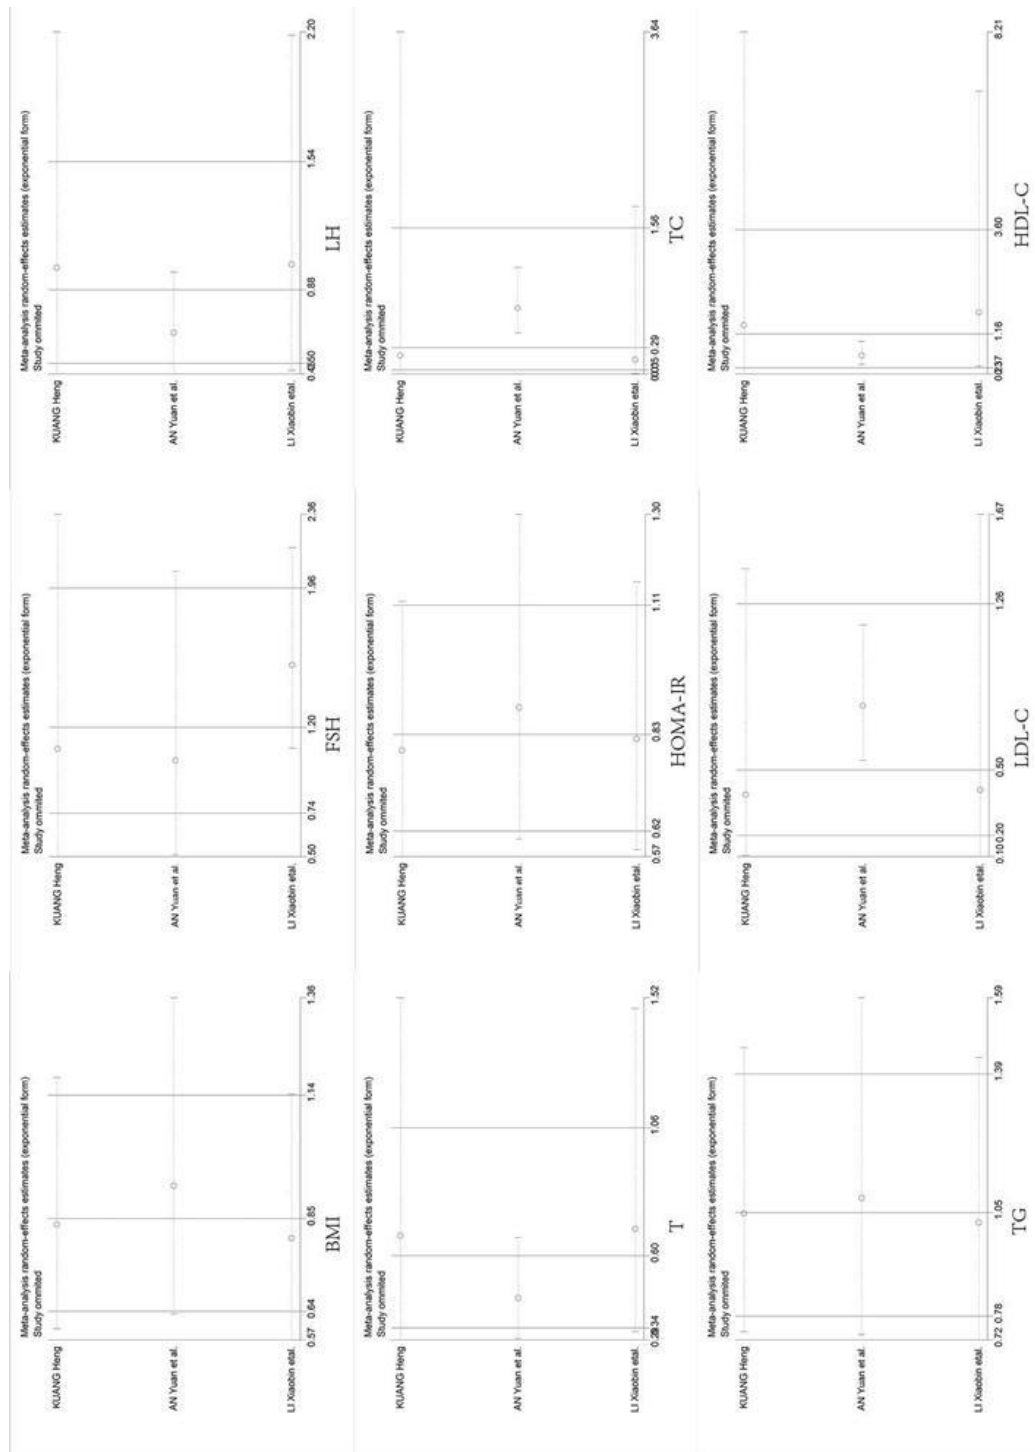

Appendix 2. Results of Sensitivity Analyses for BBR vs. MET

### Appendix 3. Forest Plots for MET+BBR vs. MET

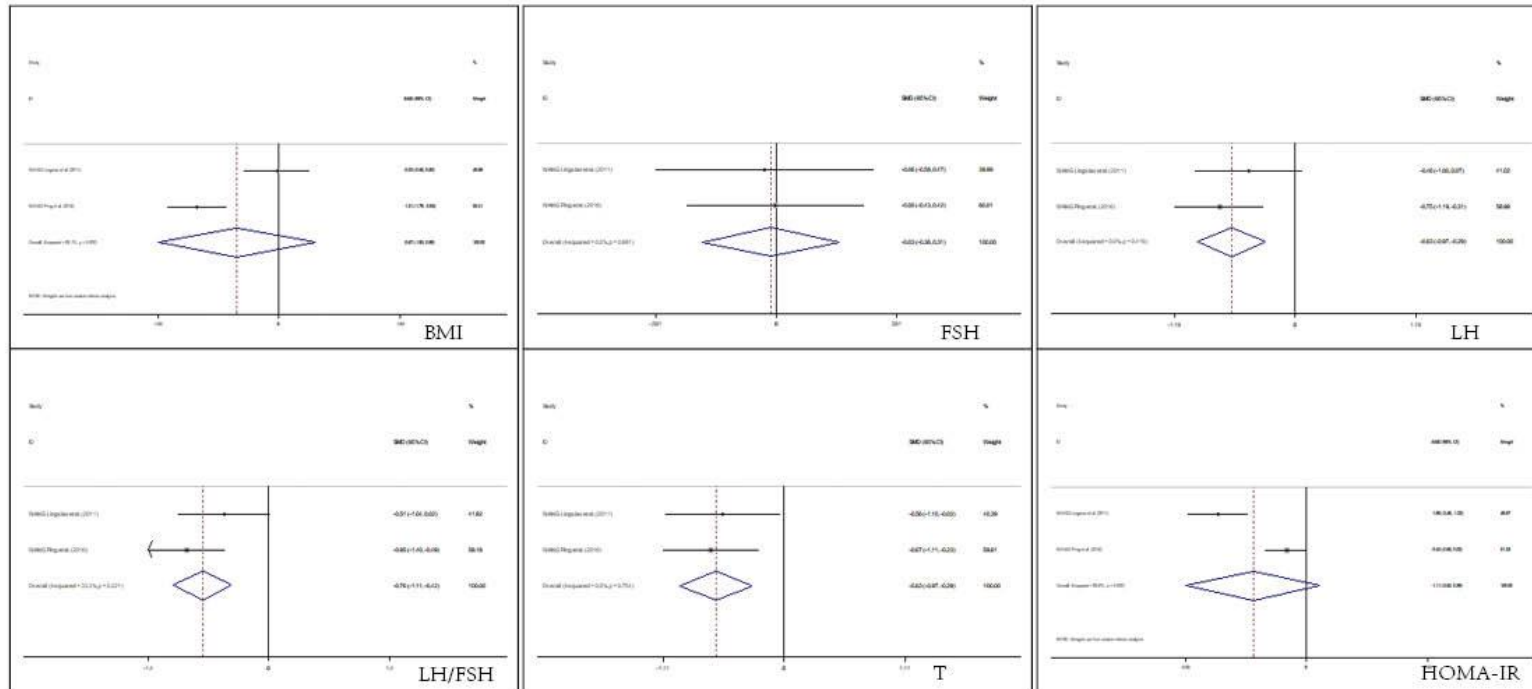

# Appendix 4. Forest Plots for CPA+BBR vs. CPA

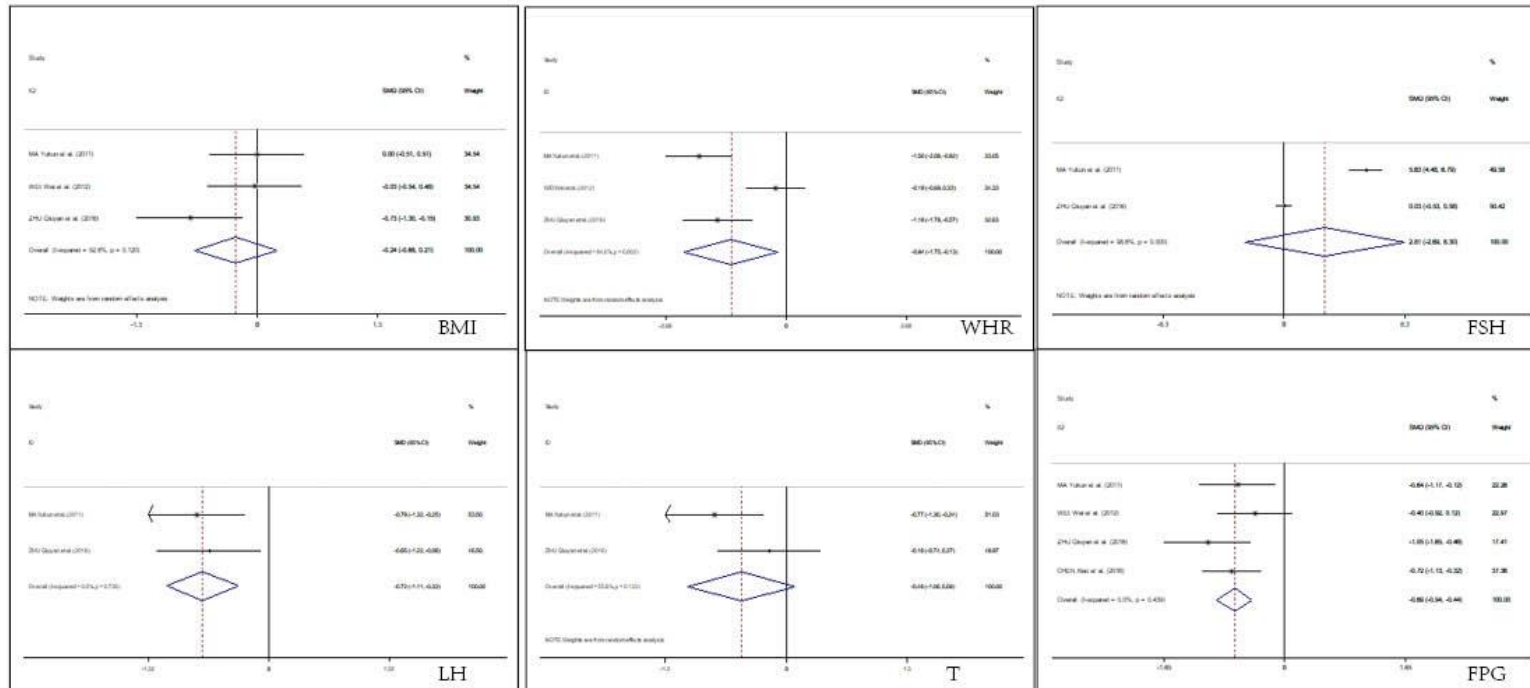

## Appendix 4. Forest Plots for CPA+BBR vs. CPA (continued)

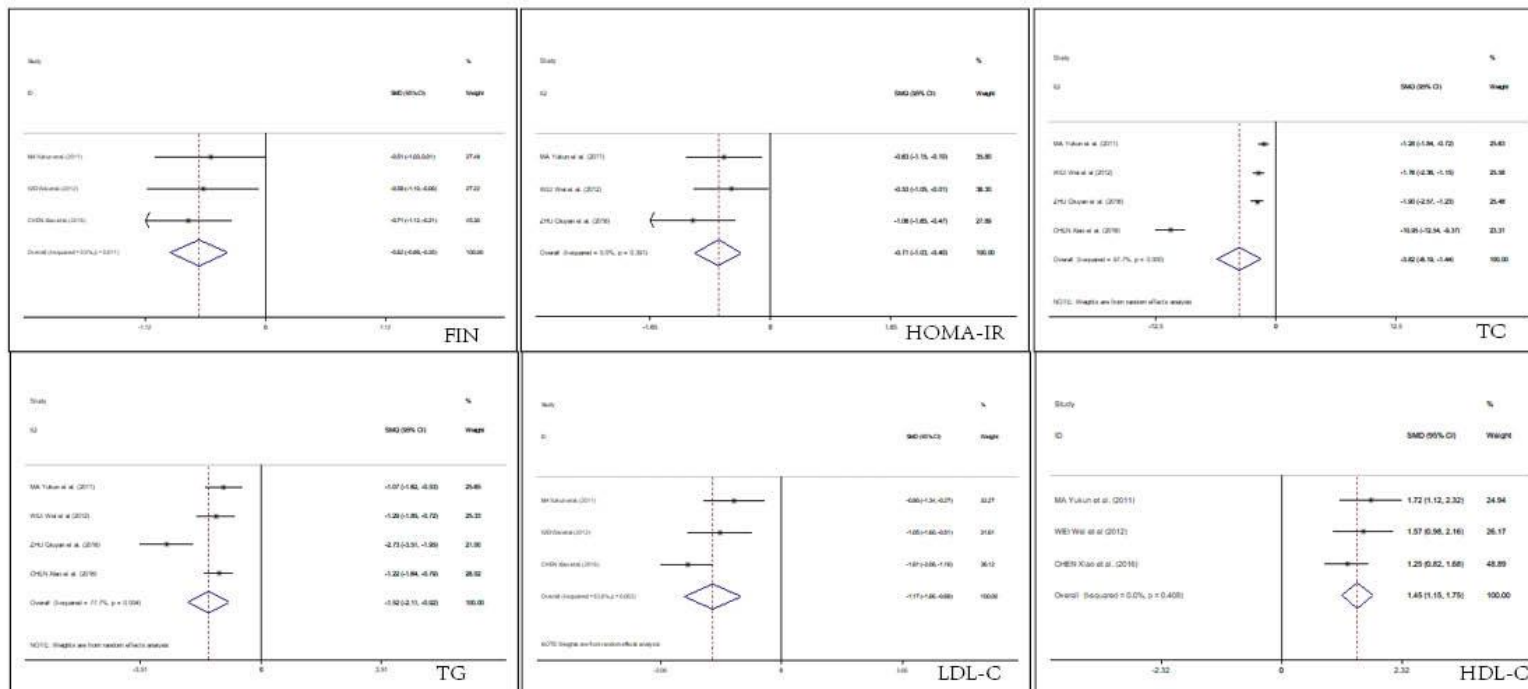

Supplement: 2532935.f1.pdf [file 2532935.f1.pdf]
